# Supplementary material for: Brain‐derived neurotropic factor mediates neuroprotection of mesenchymal stem cell‐derived extracellular vesicles against severe intraventricular hemorrhage in newborn rats
Source: PubMed Central journal article supplement — Stem Cells Transl Med. 2020 Dec 15;10(3):374–84. doi: 10.1002/sctm.20-0301 (PMC7900593; doi:10.1002/sctm.20-0301), 2020-12-15
Supplement: SCT3-10-374-s001.pdf [file SCT3-10-374-s001.pdf]

## Supplementary Figure 1

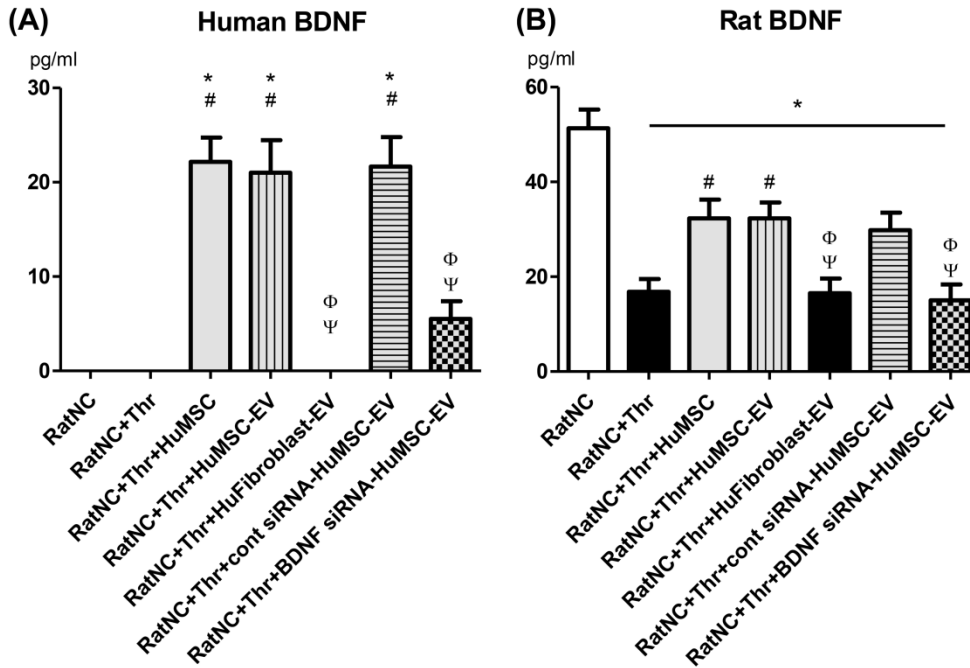

**Supplement Figure 1.** The human specific BDNF (A) and rat specific BDNF (B) levels were measured in the cell culture media in each group. Data are presented as mean  $\pm$  standard error of the mean. Abbreviations: RatNC, rat neuronal cell normal control; Thr, thrombin treatment; HuMSC, Human MSCs treatment, HuMSC-EV; extracellular vesicles from naïve human MSCs, HuFibroblast-EV; extracellular vesicles from human fibroblasts, cont siRNA HuMSC-EV; extracellular vesicles from human MSCs transfected with scrambled siRNA, BDNF siRNA HuMSC-EV; extracellular vesicles from human MSCs transfected with BDNF siRNA. Data are presented as mean  $\pm$  standard error of the mean. \* $P < 0.05$  compared to the rat neuronal cells normal control, # $P < 0.05$  compared to the rat neuronal cells treated with thrombin injury control,  $\Phi P < 0.05$  compared to rat neuronal cells treated with thrombin and human MSCs,  $\Psi P < 0.05$  compared to rat neuronal cells treated with thrombin and human MSCs-EVs.
